# Supplementary material
Source: publisher site journal article supplement (https://www.dovepress.com/get_supplementary_file.php?f=335108.docx)
Supplement: Supplementary file 1 [file get_supplementary_file.php]

**Table S1 GO** **biological process enrichment analysis for host genes of differentially expressed circRNAs**

| Term | P-value | Genes |
| --- | --- | --- |
| GO:0007062~sister chromatid cohesion | 1.47E-08 | NUP107, ZWILCH, CDCA5, CDCA8, BUB1B, PDS5A, SMC3, HDAC8, SKA1, NUP160, AURKB, CDC20, XPO1, KNTC1, BUB1, CLASP2, CENPT, CENPU, NUP133, ESCO1, DDX11, PLK1, CKAP5, NDC80, CENPE, KIF18A, CENPF, CLIP1, CENPI, ZW10, KIF2C, CENPP, SPC25 |
| GO:0035556~intracellular signal transduction | 3.02E-08 | YWHAE, DDX3X, LRRK2, DGKA, ITSN1, ARAF, PRKAG2, FMN2, PREX2, GRIP1, RPS6KA3, AKT3, STMN1, BLNK, RGS9, TNS1, RGS7, UNC13B, GUCY1A3, MAP4K1, UNC13C, MAP4K2, PRKCB, DAPK1, PRKCE, MINK1, MASTL, GMIP, TGFBR1, CIT, LATS2, MELK, NRG3, NRG4, RASA1, RASA2, KIT, DCX, ARHGEF4, LCP2, DEPDC5, ZP3, DEPDC4, DGKI, GCOM1, SHC2, ARHGEF28, TULP4, STK39, AKAP6, NOD1, ADCY2, ADCY1, ADCY8, KALRN, STYXL1, FYB, STK3, ADCY5, RACGAP1, INPP5D, CHN1, PLCG2, APBB2, GPR155, SOCS7, PAG1, MARK1, ARFGEF2, MAP3K3, STAC, PLCL1, DCDC2, DCLK2, MYO9A, DCLK1, PIKFYVE, C8ORF44-SGK3, CAMK4, PTPN6, NEK11 |
| GO:0007018~microtubule-based movement | 1.57E-07 | DNAH8, KIF14, DNHD1, KIF11, KIF15, SNX29, RACGAP1, KIF5B, KIF1C, KIF1B, KIF21B, KIF1A, DYNC1I1, DYNC2H1, DNAH10, DNAH14, KIF24, KIF23, KIF6, CENPE, KIF18A, KIF18B, KIFC1, KIF16B, KIF4A, KIF2C, KIF20A |
| GO:0051301~cell division | 1.63E-07 | RB1, USP37, CCNT2, ZWILCH, KIF14, BUB1B, KIF11, SMC3, SMC4, CDC20, CNTRL, NEK1, KNTC1, LRRCC1, TIPIN, USP44, PRKCE, NSMCE2, VRK1, MASTL, CKAP5, CDC25A, CCNA2, LATS2, KIFC1, ZW10, MCM5, FAM64A, BIRC6, KIF2C, CCNO, CDCA2, ANAPC16, CDCA5, NCAPG, CDCA8, PDS5A, SKA3, NCAPH, SKA1, AURKA, CCNB2, CCNB1, HAUS8, FAM83D, BUB1, CLASP2, CENPT, NEK4, SPAG5, USP9X, UBE2C, SETDB2, CABLES1, NDC80, CENPE, TPX2, NEDD1, CENPF, WEE1, KIF18B, CDK6, CENPJ, CDK1, TACC3, NCAPD2, NCAPD3, CDK13, CDK14, RAN, SPC25 |
| GO:0046777~protein autophosphorylation | 5.95E-07 | SMG1, CAMK2D, LRRK2, TXK, STK39, TTK, MLK4, AURKB, AURKA, CAMKK2, IGF1R, IRAK1, ERBB4, PIM1, EPHB1, EPHB4, LYN, MAP4K1, NTRK2, MAP3K3, CDKL5, DAPK1, INSR, CAD, MINK1, VRK1, PTK2, CLK1, MELK, MAPKAPK3, CAMK4, MYO3A, KIT, MAPKAPK2, DCX, ULK2, ATM, FGFR4, FGFR3, FGFR2, FGFR1, ATR |
| GO:0007067~mitotic nuclear division | 6.18E-07 | USP37, ZWILCH, BUB1B, KIF11, SMC3, KIF15, CDC20, NEK1, KNTC1, LRRCC1, OFD1, PBRM1, TIPIN, USP44, NSMCE2, VRK1, MASTL, CKAP5, CDC25A, CIT, CCNA2, ASPM, CLIP1, LATS2, ZW10, FAM64A, BIRC6, KIF2C, CDCA2, ANAPC16, CDCA5, DCTN3, SKA3, SKA1, AURKB, AURKA, CCNB2, HAUS8, FAM83D, BUB1, CENPT, NEK4, USP9X, SETDB2, PLK1, NDC80, ANLN, TPX2, NEDD1, CENPF, WEE1, CDK1, RAN, SPC25 |
| GO:0043547~positive regulation of GTPase activity | 1.53E-06 | DENND5B, ITSN1, KNDC1, FNBP1L, PREX2, ARHGAP44, DOCK11, RGS3, RINL, OPHN1, PLCE1, RGS9, RGS7, CDKL5, FNBP1, FRS2, ACAP3, ACAP2, ACAP1, ELMO1, AMPH, PKP4, RIN2, LLGL1, SHC2, ARHGEF28, PIK3R2, IQGAP1, KALRN, RASGRP1, ARHGAP12, RAP1A, RIC8B, RACGAP1, NCKAP1L, SRGAP3, A2M, SPTBN1, RAP1GAP2, KL, TBCD, GRIN2B, PTK2, NF1, FGFR4, FGFR3, FGFR2, FGFR1, RET, DOCK5, DENND1B, DOCK4, DOCK3, DOCK9, RASGRF2, DOCK8, LRRK2, DENND1A, SNX13, FLCN, PSD4, PSD3, SH3BGRL3, RALGPS2, PSD, VAV3, SH2D3C, GFRA1, AXIN2, GMIP, VAV2, ARHGAP10, RABEP1, RASA3, NRG4, RASA1, RASA2, KIT, IL3RA, ARHGEF4, DEPDC5, RAPGEF6, ARHGEF6, CAMK2D, RAP1GDS1, ASAP1, ASAP2, IL2RG, ERBB4, CHN1, RGS20, EPS8L2, FNIP1, ARFGEF2, MYO9A, STXBP5L, DLC1, SMAP1 |
| GO:0006468~protein phosphorylation | 1.54E-06 | RET, CCNT2, FASTKD1, LRRK2, GMFG, LRRK1, PRKAG1, ILK, BUB1B, PRKAG2, CCNC, IKBKAP, MLK4, RPS6KA3, RPS6KA6, RASSF2, AKT3, PIM1, NEK1, MAP3K5, MAP4K1, MAP4K2, CDKL5, CHUK, PRKCB, DAPK1, PRKCE, MINK1, VRK1, PRPF4B, TGFBR1, CIT, LATS2, PIK3CA, MAPKAPK2, BMP2K, TRIB3, BIRC6, ALPK2, GAS6, CDKL1, CAMK2D, PXK, TXK, STK39, PIK3R1, KALRN, FYB, AURKB, STK3, AURKA, CAMKK2, TBRG4, PHKG1, IRAK1, RPS6KC1, TRPM6, BUB1, MARK1, LYN, MAP3K2, MAP3K1, NEK4, MLKL, PLK1, PHKB, MERTK, SMAD5, DCLK1, TBCK, CDK6, C8ORF44-SGK3, ADCK1, CAMK4, NEK10, ATM, PKN1, CAMK1, BMPR1B, CDK14, FRK, FGFR1, NEK11 |
| GO:0006260~DNA replication | 2.00E-06 | NFIX, MCM7, MCM8, MCM10, BRCA1, ORC5, POLD4, CHAF1B, BRIP1, WRN, CDC45, TOP1MT, CHEK1, POLI, TOPBP1, NBN, CLSPN, CDT1, RRM1, TIPIN, RRM2, REV1, NAP1L1, CDC25A, TICRR, CCDC88A, POLA1, NFIA, KIAA0101, POLE2, CDK1, MCM4, RAD17, MCM5, ATM, DNA2, DTL, ATR |
| GO:0007052~mitotic spindle organization | 4.79E-06 | GPSM2, STIL, TTK, WDR62, KIF11, SMC3, EML1, NDC80, AURKA, CCNB1, STMN1, RAN, CLASP2, SPC25 |
| GO:0018105~peptidyl-serine phosphorylation | 5.72E-06 | SMG1, CAMK2D, PRKDC, LRRK2, STK39, ILK, TTK, AKT3, PDK3, CLSPN, MAP4K1, PRKCB, PRKCE, PLK1, DCLK2, MASTL, VRK3, TGFBR1, DCLK1, CLK1, LATS2, MAPKAPK3, C8ORF44-SGK3, CAMK4, MAPKAPK2, CDK1, DCX, ATM, PKN1, GAS6, TDGF1, ATR |
| GO:0018108~peptidyl-tyrosine phosphorylation | 1.03E-05 | RET, TTK, CAMKK2, TTN, RELN, ERBB4, CNTRL, NEK1, ABL2, EPHB1, EPHB4, MAP2K5, LYN, STAT5A, EPHA5, NTRK2, EPHA7, INSR, MERTK, PTK2, CLK1, WEE1, MELK, ABI3, NRG4, AXL, ABI1, KIT, IL3RA, PTPN6, ROR1, FGFR4, FGFR3, FGFR2, EPHA3, FGFR1 |
| GO:0000086~G2/M transition of mitotic cell cycle | 1.55E-05 | YWHAE, KDM8, DCTN3, CCP110, PPP2R2A, FOXM1, PPM1D, AURKA, CCNB2, CCNB1, HAUS8, CHEK1, CNTRL, CEP192, CEP76, OFD1, CEP135, FBXW11, PLK1, MASTL, TPD52L1, CKAP5, CDC25A, CIT, NEDD1, TPX2, WEE1, MELK, CENPJ, CDK1, PPP1R12B, CDK14, AJUBA |
| GO:0000281~mitotic cytokinesis | 1.97E-05 | USP8, CUL7, PLK1, KIF23, ANLN, APC, RACGAP1, RASA1, KIF4A, STMN1, NUSAP1, KIF20A, SPTBN1 |
| GO:0007077~mitotic nuclear envelope disassembly | 1.27E-04 | NDC1, POM121, NUP205, NUP107, NUP133, NUP210, PRKCB, PLK1, VRK1, AAAS, NUP160, CCNB2, CCNB1, CDK1, NUP35 |
| GO:0000082~G1/S transition of mitotic cell cycle | 1.52E-04 | RB1, PRIM2, USP37, CAMK2D, MCM7, MCM8, CDCA5, PRIM1, CUL2, MCM10, IQGAP3, ORC5, PPP3CA, CDC45, CDT1, RRM2, CDC25A, POLA1, LATS2, CDK6, POLE2, CDK1, MCM4, MCM5, CDKN3 |
| GO:0006974~cellular response to DNA damage stimulus | 1.69E-04 | TOP2A, BTG2, MCM7, MCM8, MCM10, FMN2, BRCA1, SMC6, AATF, CHD2, NPAS2, POLB, WRN, CHEK1, PMAIP1, TOPBP1, TP63, VAV3, LYN, CTC1, POLQ, TIPIN, NEK4, ATAD5, FANCL, ZBTB38, DDX11, MASTL, USP28, RAD52, RAD51, APC, KIAA0101, UBE2T, MAPKAPK2, ERCC8, RAD17, ATM, DTL, RAD18, ATR |
| GO:0021987~cerebral cortex development | 1.78E-04 | NCOA1, YWHAE, NTRK2, CNTNAP2, MKKS, LRP1, KIF14, WDR62, LRP8, LRP6, ASPM, MDK, NF1, TACC3, FAT4, TACC2, CDON |
| GO:0006281~DNA repair | 3.08E-04 | SMG1, BTG2, PARPBP, BRCA1, FOXM1, PDS5A, SMC3, POLB, CHAF1B, WRN, CHEK1, POLI, RAD54L, TOPBP1, NBN, CLSPN, FANCI, POLQ, FANCL, USP3, DDX11, ACTL6A, FANCA, REV1, USP28, TICRR, RAD52, MSH6, POLA1, RAD51, NEIL2, MSH2, FANCD2, MSH3, ERCC1, TDP1, UBE2T, POLE2, RFWD3, CDK1, RAD17, ATM, RAD18, ATR |
| GO:0048813~dendrite morphogenesis | 3.12E-04 | RERE, DSCAM, MINK1, SLC11A2, CACNA1A, FMN1, DCLK1, PREX2, ABI1, DCX, HPRT1, CTNNA2, PICALM |
| GO:0048010~vascular endothelial growth factor receptor signaling pathway | 4.50E-04 | VAV3, NCKAP1, XBP1, SHC2, VEGFB, PIK3R2, PIK3CB, PIK3R1, PTK2, VAV2, PIK3CA, MAPKAPK3, AXL, MAPKAPK2, ABI1, ELMO1, ELMO2, NCKAP1L, WASF2 |
| GO:0006198~cAMP catabolic process | 4.70E-04 | PDE10A, PDE4D, PDE2A, PDE3B, PDE3A, PDE4B, PDE4A, PDE7A |
| GO:0007076~mitotic chromosome condensation | 4.70E-04 | CDCA5, NUSAP1, NCAPG, NCAPD2, NCAPD3, SMC4, NCAPH, TTN |
| GO:0007051~spindle organization | 7.58E-04 | ASPM, SPAG5, TTK, CHD3, KIF11, CKAP5, AURKB, AURKA |
| GO:0006611~protein export from nucleus | 7.70E-04 | HSPA9, NXT1, XPO1, XPO4, CSE1L, XPO6, RANBP17, XPO5, XPO7, CALR, RAN |
| GO:0071333~cellular response to glucose stimulus | 8.59E-04 | UNC13B, XBP1, MEF2C, SERPINF1, FOXO3, AACS, PPP3CA, GCLC, RAP1A, PIK3CA, UCP2, NOX4, PDK3, GAS6, SOX4 |
| GO:0008283~cell proliferation | 8.71E-04 | CHRM3, EHF, USPL1, MCM7, CSE1L, ILK, BUB1B, MCM10, MKI67, KIF15, HHEX, UCHL1, PIM1, PLCE1, NBN, APPL2, DLGAP5, MAP4K1, USP8, SERPINF1, ENTPD5, HDGFRP3, AXIN2, CDC25A, KAT2A, MELK, KIF2C, GAS6, SLC29A2, LAMA5, ENPEP, LRP1, PRKDC, TGFA, AURKB, ERBB4, PES1, PDPN, POC1B, ASCC3, FAM83D, BUB1, STIL, PLK1, LY86, USP28, BYSL, CLK1, POLA1, TPX2, BOP1, CENPF, DAB2, KRT16, ERCC1, CDK1, TACC3, PTPN6, TACC2, PICALM |
| GO:0043406~positive regulation of MAP kinase activity | 1.09E-03 | TENM1, MEF2C, MAGED1, LRRK2, ILK, IQGAP1, TPD52L1, RASGRP1, PIK3R6, IRAK1, KIT, NEK10, NOX4, PDE5A, AJUBA, FGFR1 |
| GO:0006886~intracellular protein transport | 1.22E-03 | COPB2, IPO11, UNC93B1, COPB1, USO1, SNX13, GRIK2, IPO7, AP3M2, AP4M1, RIMS2, XPO1, XPO6, TBC1D30, MYO6, VPS11, STX6, TIMM17B, TBC1D14, VPS35, TBC1D12, STX3, VPS39, SNX5, SNX6, RPH3AL, RABGAP1L, SEC24A, RANBP17, TBC1D9, XPO7, AP3B1, SYTL4, COPZ1, SYTL3, SYTL2, SGSM1, TBCK, TBC1D5, SEC24D, ZP3, RAN |
| GO:0016925~protein sumoylation | 1.27E-03 | TOP2A, TOP2B, POM121, NUP205, NUP107, CDCA8, BRCA1, SMC6, AAAS, SMC3, NUP160, AURKB, RNF212, WRN, NDC1, NUP133, EYA1, NUP210, BCL11A, NSMCE2, SENP2, PHC3, RAD52, UBA2, NUP35 |
| GO:0008340~determination of adult lifespan | 1.31E-03 | MSH6, MSH2, INPP5D, LRRK2, RAD54L, ATM, IDE |
| GO:0006270~DNA replication initiation | 1.35E-03 | ORC5, PRIM2, POLA1, CDC45, MCM7, POLE2, PRIM1, MCM4, MCM10, MCM5, TOPBP1 |
| GO:0000722~telomere maintenance via recombination | 1.35E-03 | PRIM2, POLD4, POLA1, WRN, RAD51, POLE2, PRIM1, NSMCE2, DNA2, SMC6, BRCA2 |
| GO:0007411~axon guidance | 1.43E-03 | ROBO2, TENM2, SEMA3C, NRXN1, NTN4, CRMP1, SEMA3F, ROBO1, CDH4, RELN, OPHN1, DPYSL5, DPYSL2, KIF5B, TNR, APBB2, SLIT3, EPHB1, SPTBN1, EPHA5, LAMB2, DCC, ETV1, UNC5C, UNC5D, BMP7, MAPK8IP3, PTK2, TTC8, NR4A3, CNTN4 |
| GO:0019933~cAMP-mediated signaling | 1.59E-03 | RIMS2, EPHA5, PDE4D, PDE2A, NPR3, PDE3A, AKAP6, ADM, ADCY2, ADCY1, ADCY8, ADCY5 |
| GO:0007059~chromosome segregation | 1.83E-03 | TOP2A, CENPT, CDCA2, DDX3X, SPAG5, USP9X, SETDB2, BRCA1, KIF11, SKA3, NDC80, SKA1, CENPE, CENPF, TOP1MT, NEK10, SPC25 |
| GO:0051966~regulation of synaptic transmission, glutamatergic | 1.90E-03 | MEF2C, GRM7, OPHN1, SYT1, CNR1, LRRK2, GRM8, KALRN, DGKI |
| GO:0010738~regulation of protein kinase A signaling | 2.09E-03 | PDE10A, SPHKAP, LRRK2, AIP, PDE4A, AKAP6, PJA2 |
| GO:0007019~microtubule depolymerization | 2.22E-03 | KIF18A, KIF18B, STMN1, KIF14, KIF24, KIF2C |
| GO:0034501~protein localization to kinetochore | 2.22E-03 | ZW10, CHAMP1, CDK1, BUB1B, TTK, AURKB |
| GO:0030168~platelet activation | 2.25E-03 | LYN, VAV3, TRPC7, VWF, PRKCB, DGKA, PRKCE, ITPR2, ITPR3, PIK3CB, PIK3R1, MERTK, PIK3R6, VAV2, F8, COL1A2, PIK3CA, AXL, PDPN, PLCG2, LCP2, PTPN6, GAS6, DGKI |
| GO:0006890~retrograde vesicle-mediated transport, Golgi to ER | 2.26E-03 | COPB2, NBAS, COPB1, KIF23, KIF11, COPZ1, KIF15, CENPE, RINT1, KIF18A, SCFD1, RACGAP1, KIF4A, ZW10, KIF1C, KIF2C, RAB6B, ATP9B, ATP9A |
| GO:0030325~adrenal gland development | 2.50E-03 | MDK, INSR, NF1, ARID5B, APOA1, PBX1, DKK3, STRA6 |
| GO:0030010~establishment of cell polarity | 2.58E-03 | WEE1, WWC1, UST, MARK3, EPHB1, PTK2, MPP7, JAM3, MARK1 |
| GO:0000731~DNA synthesis involved in DNA repair | 2.86E-03 | POLD4, POLA1, BRIP1, WRN, RAD51, ATM, BRCA1, DNA2, NBN, BRCA2, PALB2 |
| GO:0006865~amino acid transport | 2.86E-03 | SLC7A6, SLC38A1, SLC43A2, SLC43A1, PDPN, SLC17A5, SLC16A10, SLC7A11, SLC6A20, SLC7A1, SLC38A5 |
| GO:0051726~regulation of cell cycle | 2.88E-03 | RB1, FOXM1, CCNB2, CCNB1, PES1, MYBL2, CDKL5, MX2, PLK1, CABLES1, MASTL, CDC25A, RBL2, BOP1, CENPF, WEE1, RBL1, KIAA0101, ID3, ATM, SRSF5, PRR11, CDK14, DTL, CDKL1 |
| GO:0000165~MAPK cascade | 2.91E-03 | RET, SHC2, CAMK2D, PSMD14, RASGRF2, LRRK2, ARAF, IL2RG, RASGRP1, CAMKK2, PSMB4, PSMB5, ERBB4, PSMD3, PSMB1, MARK3, SPTBN1, MAP3K5, KL, MAP3K3, MEF2C, MAP3K1, FRS2, GFRA1, GRIN2B, PTK2, DUSP6, ITPKB, MAP3K15, PSMC3, RASA3, MAPKAPK3, NRG4, RASA1, RASA2, KIT, IL3RA, MAPKAPK2, NF1, PSME2, FGFR4, FGFR3, FGFR2, FGFR1 |
| GO:0021510~spinal cord development | 3.20E-03 | ROBO2, DPYSL2, ACTL6A, ZIC1, NF1, PHGDH, SOX11, PKD2, SOX4, PTBP2 |
| GO:0021915~neural tube development | 3.20E-03 | CECR2, STIL, NOTCH1, SEMA3C, NUP133, NF1, PHGDH, PROX1, PKD2, DACT1 |
| GO:0007399~nervous system development | 3.41E-03 | SEMA5A, HDAC4, TENM1, CHRM3, CNTFR, GDA, FUT10, SHOX2, CRMP1, MTR, SPG7, KALRN, PCDH18, ROBO1, GLIS2, PCDHA1, OPHN1, DPYSL5, ERBB4, MDK, DPYSL2, ENC1, ST8SIA4, DPF3, APOB, NDUFV2, RGS9, MEF2C, MBNL1, DSCAM, APAF1, SLC4A10, LSAMP, VPS13A, GFRA1, NAV2, DCLK1, TTLL7, NELL1, DLG2, GLRB, SCN8A, MPPED2, DCX, CNTN4, SIM1, RBM45 |
| GO:0070372~regulation of ERK1 and ERK2 cascade | 3.45E-03 | LYN, EPHA7, NEK10, PTPN6, FRS2, FAM83D, RASGRP1, EPHB1, FGFR2 |
| GO:0007094~mitotic spindle assembly checkpoint | 3.50E-03 | CENPF, APC, ZW10, PLK1, BUB1B, ATM, TTK, BUB1 |
| GO:1901998~toxin transport | 3.59E-03 | CCT3, DNAJA1, COPB2, SCFD1, VPS11, TRIP4, RAB28, CCT8, ANTXR2, COPZ1, LRP6 |
| GO:0051279~regulation of release of sequestered calcium ion into cytosol | 3.70E-03 | LYN, DIAPH1, PRKCE, PTPN6, ANK2, CORO1A |
| GO:0000732~strand displacement | 4.52E-03 | BRIP1, WRN, RAD51, ATM, BRCA1, DNA2, NBN, BRCA2, PALB2 |
| GO:0007158~neuron cell-cell adhesion | 4.62E-03 | RET, NLGN4Y, NRXN1, NRXN2, TNR, CNTN4, NCAM2 |
| GO:0036092~phosphatidylinositol-3-phosphate biosynthetic process | 4.63E-03 | KL, FRS2, PIK3R2, PIK3CB, PIK3R1, INPP4B, PIKFYVE, PIK3CA, ATM, FGFR4, FGFR3, FGFR2, FGFR1 |
| GO:0007093~mitotic cell cycle checkpoint | 5.15E-03 | RB1, ZWILCH, ZW10, CHEK1, RAD17, BUB1B, KNTC1, TTK, NBN, BUB1 |
| GO:0006409~tRNA export from nucleus | 5.15E-03 | NDC1, POM121, NUP205, NUP107, NUP133, NUP210, NUP35, AAAS, RAN, NUP160 |
| GO:0009790~embryo development | 5.47E-03 | STOX2, LAMA5, NR5A2, RACGAP1, RASA1, NOTCH4, FUT10, ATP5A1, UBR3, TDGF1, PTK2 |
| GO:0032508~DNA duplex unwinding | 5.57E-03 | BRIP1, WRN, DDX3X, CDC45, DDX11, MCM5, CHD3, DNA2, NBN, ASCC3, CHD2, CHD1 |
| GO:0035329~hippo signaling | 5.83E-03 | MOB1B, YWHAE, LATS2, WWC1, NPHP4, FAT4, PJA2, TEAD2, STK3 |
| GO:0060045~positive regulation of cardiac muscle cell proliferation | 6.36E-03 | MEF2C, CCNB1, NOTCH1, ERBB4, CDK1, ZFPM2, FGFR2, FGFR1 |
| GO:0031647~regulation of protein stability | 6.41E-03 | XBP1, HDAC3, USP3, ANK2, USP28, HDAC8, AURKA, PYCARD, TF, KAT2A, GIPC1, VPS11, VPS35, DPH6, SOX4, DACT1 |
| GO:2000650~negative regulation of sodium ion transmembrane transporter activity | 6.42E-03 | CAMK2D, PRKCE, NEDD4, STK39, NEDD4L |
| GO:0000076~DNA replication checkpoint | 6.42E-03 | CDT1, TIPIN, CDC45, RAD17, DNA2 |
| GO:0051983~regulation of chromosome segregation | 6.42E-03 | KIF2C, MKI67, BUB1, AURKB, PUM2 |
| GO:0021860~pyramidal neuron development | 6.42E-03 | SLC4A10, DCX, DCLK2, ATP7A, FGFR2 |
| GO:0010827~regulation of glucose transport | 6.42E-03 | NDC1, POM121, NUP205, NUP107, NUP133, NUP210, NUP35, TRIB3, AAAS, NUP160 |
| GO:2000811~negative regulation of anoikis | 6.50E-03 | NTRK2, TLE1, NOTCH1, PIK3CA, ITGA5, PTK2, MCL1 |
| GO:0050804~modulation of synaptic transmission | 6.50E-03 | NLGN4Y, PPP3CA, PXK, RELN, GRIK2, BTBD9, LRP8 |
| GO:0006470~protein dephosphorylation | 7.30E-03 | PTPRT, MTMR2, PTPRN2, FBXW11, PPP2R3B, TPTE, PPP2R2A, PPM1D, PTPN13, SSH2, STYXL1, SSH1, CTTNBP2NL, MTMR7, PTPRD, PPP3CA, PTPRB, PDP2, NCEH1, PPP3CC, PTPRZ1, PTPN9, PTPN6, DLGAP5 |
| GO:0016032~viral process | 7.36E-03 | RB1, YWHAE, RTN3, VAC14, NCKAP1, POM121, CUL7, SF3B2, NUP205, NUP107, SATB1, COPB1, CUL2, FBLN1, PIK3R1, AAAS, IL2RG, IPO7, SUPT6H, NUP160, PSMB4, XPO1, PSMB5, PSMB1, HNRNPA1, WASF2, BUB1, MAP3K5, NDC1, LYN, CENPU, NUP133, NUP210, DDX11, SND1, MSH6, CCNA2, POLA1, KAT2A, KRT19, RBL1, PSMC3, ABI1, NUP35, VDAC1, CDK13, RAN |
| GO:0001764~neuron migration | 7.40E-03 | YWHAE, NTRK2, TOP2B, MEF2C, CDKL5, USP9X, DCC, DCDC2, NAV1, DCLK1, PTK2, ASPM, RELN, AXL, DNER, DCX, NRCAM, APBB2, GAS6, MARK1, FGFR1 |
| GO:0014066~regulation of phosphatidylinositol 3-kinase signaling | 7.69E-03 | KL, ENTPD5, FRS2, PIK3R2, PIK3CB, PIK3R1, PTPN13, RASGRP1, PIK3CA, NRG4, ERBB4, KIT, PIP5K1B, FGFR4, FGFR3, FGFR2, FGFR1 |
| GO:0015031~protein transport | 7.86E-03 | DENND1B, RAB3C, PGAP1, DENND1A, FMN2, LYST, SEC61A2, AP4M1, SEC61A1, RINL, NDC1, RAB2A, CADPS2, SLC15A2, NUP210, VPS33B, COG2, VPS13B, SENP2, COPZ1, DOPEY1, RINT1, DOPEY2, ACAP1, RABEP1, ZW10, KIF20A, ASTN2, UNC119B, NBAS, RAB5C, PIK3R2, AAAS, NUP160, HSP90B1, SCFD1, RAP1A, RAB11FIP1, RAB25, VPS8, MVB12A, VPS54, SNX7, RAB6B, ARFGEF2, XBP1, MX2, SNX24, BBIP1, STXBP5L, TTC8, KIF18A, CENPF, DAB2, FRAS1, HOOK1, SNX14, CORO7, RAB5A |
| GO:0030326~embryonic limb morphogenesis | 8.06E-03 | FBN2, DYNC2H1, MBNL1, CYP26B1, FRAS1, PRRX1, MEGF8, BMP7, TP63, PBX1, FGFR1 |
| GO:0007229~integrin-mediated signaling pathway | 8.20E-03 | VAV3, LAMA5, COL16A1, ITGB4, TXK, PLEK, ADAM22, APOA1, ILK, ADAM32, FBLN1, PTK2, DAB2, ADAMTS3, ADAM12, ITGA8, ITGB7, CD47, ITGB6, ITGA5 |
| GO:0032006~regulation of TOR signaling | 8.60E-03 | FLCN, RRAGC, ARAF, FAM83D, TELO2, TTI1 |
| GO:0098609~cell-cell adhesion | 8.92E-03 | YWHAE, DDX3X, DOCK9, USO1, CAPG, ASAP1, IQGAP1, FNBP1L, EVPL, FAM129B, CNN2, DNAJB1, CCNB2, KIAA1524, TRIM29, KIF5B, MYO6, RPL14, EPS8L2, CCT8, WASF2, ZC3H15, SPTBN1, SNX5, USP8, UNC5D, CKAP5, SND1, MPP7, HCFC1, ANLN, TMEM2, FMNL2, EIF2S3, VAPA, GIPC1, GLOD4, ABI1, ELMO2, EIF3E, RAN, DBN1, PICALM |
| GO:0010942~positive regulation of cell death | 9.29E-03 | FAF1, UCP2, TRIM13, HBA2, NOD1, AXIN2, HBA1, KCNK2, DUSP6 |
| GO:0031100~organ regeneration | 9.40E-03 | PRPS2, CCNA2, NOTCH1, NR4A3, AXL, CAD, CDK1, APOA1, ADM, LCP1, MKI67, GAS6 |
| GO:0045860~positive regulation of protein kinase activity | 9.40E-03 | CENPE, DAB1, RELN, RAP1A, RASSF2, PRKAG1, PRKAG2, LCP2, IQGAP1, ZP3, GAS6, PTK2 |
| GO:0060271~cilium morphogenesis | 9.49E-03 | SPAG16, UNC119B, NOTCH1, ARL3, ASAP1, TBC1D32, TCTN2, NEK1, POC1B, C5ORF42, RAB8B, OFD1, DYNC2H1, ACTR3, MKKS, CCDC113, SCLT1, KIF24, BBIP1, WDR35, TTC8, IFT88, WDPCP, CCNO, CEP89 |
| GO:0000278~mitotic cell cycle | 9.66E-03 | CENPT, CENPE, RRM1, CENPF, KIF18B, PPP2R2C, NEK4, USP3, CNTRL, MYB, PPP2R2A |
| GO:0007165~signal transduction | 9.83E-03 | SH3GL3, CHRM3, CNTFR, VIPR2, CTNND2, SMC3, IPO7, ANTXR1, IGF1R, PYCARD, ARHGAP44, RPS6KA3, RPS6KA6, ALCAM, GRB14, OPHN1, DPYSL5, DPYSL2, AKT3, STMN1, UNC13B, TLE1, IL4R, DAPK1, PRKCB, PRKCE, MAGI2, AIP, ANK2, UNC5C, UNC5D, INPP4B, MAPKAPK3, TRIM13, PKP1, ULK2, RIN2, PDE9A, GRIA1, GRIA2, PEX11B, ITPR2, PIK3R2, IQGAP1, PIK3R1, TRHDE, KALRN, RASGRP1, IQGAP3, STK3, ARHGAP12, C3, RAP1A, IRAK1, RACGAP1, MICAL1, INPP5D, ABL2, NPHP4, HIVEP3, SRGAP3, PAG1, RHBDL1, MAP2K5, YARS, LYN, DTNA, NDFIP1, JUP, BCL11A, STAC, LRRN2, PDE2A, LNPEP, SMAD5, GULP1, GKAP1, NF1, ATM, RET, PTPRT, TENM1, GABRB1, TENM2, TENM4, SLC44A2, PDE3B, PRKAG1, ADM, IKBKAP, PIK3CB, LSP1, AKAP10, MDK, PDE4B, PDE4A, APPL2, CD33, PSD, CAP1, ANKDD1A, PDE4D, ACTL6A, TRAF2, ABCC9, ZDHHC17, TGFBR1, VAV2, ITPKB, ARHGAP10, RASA3, RASA1, RASA2, IL1RAPL1, KIT, PDE5A, TLR6, PPP1R12B, GAS6, DEPDC4, VAC14, COL15A1, NRXN1, NRXN2, TPTE, NOD1, ADCY8, ATP2C1, IL2RG, LRP8, FYB, ERBB4, RPS6KC1, CHN1, PDPN, GABRE, MPP3, MYO10, MX1, MYO9A, SORL1, PDE10A, VAPA, AXL, CAMK4, DLC1, CAMK1, PKN1, PDE7A, RAN |
| GO:0030198~extracellular matrix organization | 1.00E-02 | FBN2, LAMA5, COL16A1, COL14A1, ITGB4, LAMA4, SERPINE1, FBLN1, FBLN5, TNR, APBB2, ITGB7, ITGB6, ATP7A, JAM3, LAMB3, VWF, LAMB2, BGN, NPNT, HSPG2, DCN, PTK2, COL1A2, COL4A4, PXDN, ITGA8, NF1, COL4A5, COL6A3, CD47, ITGA5, CD44 |
| GO:0046854~phosphatidylinositol phosphorylation | 1.04E-02 | KL, SMG1, FRS2, PIK3R2, PIK3CB, PIK3R1, EFR3B, PIK3R6, PIKFYVE, PIK3CA, NRG4, ERBB4, KIT, PIP5K1B, FGFR4, FGFR3, FGFR2, FGFR1, IP6K2 |
| GO:0043550~regulation of lipid kinase activity | 1.04E-02 | RB1, RBL2, VAC14, RBL1 |
| GO:0030174~regulation of DNA-dependent DNA replication initiation | 1.04E-02 | CDT1, TEX10, NBN, TICRR |
| GO:0021942~radial glia guided migration of Purkinje cell | 1.04E-02 | RERE, DAB1, CTNNA2, SOCS7 |
| GO:0043570~maintenance of DNA repeat elements | 1.04E-02 | MSH6, MSH2, MSH3, AXIN2 |
| GO:0090197~positive regulation of chemokine secretion | 1.06E-02 | PYCARD, IL33, C5, IL4R, LPL |
| GO:1904754~positive regulation of vascular associated smooth muscle cell migration | 1.06E-02 | DOCK5, DOCK4, XBP1, DOCK7, IQGAP1 |
| GO:0035235~ionotropic glutamate receptor signaling pathway | 1.07E-02 | GRIA1, CLN3, GRIA2, GRID2, GRIN3A, GRID1, GRIK2, GRIN2B |
| GO:0000724~double-strand break repair via homologous recombination | 1.08E-02 | POLQ, PSMD14, MCM8, NSMCE2, TONSL, BRCA1, SMC6, BRCA2, PALB2, MMS22L, ZFYVE26, RAD51, RNF138, RAD54L, ATM, NBN |
| GO:0000077~DNA damage checkpoint | 1.15E-02 | BRIP1, CHEK1, RAD17, ATM, INTS7, NBN, CLSPN, USP28, ATR |
| GO:0071625~vocalization behavior | 1.22E-02 | NLGN4Y, CNTNAP2, BRINP1, NRXN1, NRXN2, MYH14 |
| GO:0043065~positive regulation of apoptotic process | 1.23E-02 | TOP2A, NOTCH1, DDX3X, PRKDC, RASGRF2, FAF1, ITSN1, LPAR1, ADM, FOXO3, KALRN, STK3, PYCARD, FLCN, RASSF2, ERBB4, CNR1, INPP5D, ANKRD1, PMAIP1, APBB2, SOX4, CTNNBL1, IP6K2, MAP3K5, UNC13B, NCOA1, VAV3, APAF1, UNC5C, BMP7, DUSP6, VAV2, DNAJA1, SFRP4, LATS2, MELK, APC, KCNMA1, NF1, ID3, NOX4, ARHGEF4, ATM, GPLD1, ARHGEF6 |
| GO:0010976~positive regulation of neuron projection development | 1.25E-02 | LYN, RET, NTRK2, ATP8A2, BCL11A, SERPINF1, MAGI2, CBFA2T2, RELN, RAP1A, CNR1, ENC1, ANKRD1, ABL2, DMD, CAMK1, EPHA3, FGFR1 |
| GO:0007169~transmembrane receptor protein tyrosine kinase signaling pathway | 1.25E-02 | LYN, PTPRT, RET, NTRK2, SHC2, INSR, TXK, PIK3CB, PTPRG, IGF1R, ERBB4, KIT, ABI1, BLNK, ABL2, LCP2, ROR1, FRK, PAG1 |
| GO:0000070~mitotic sister chromatid segregation | 1.35E-02 | KIF18B, SPAG5, KIFC1, ZW10, PLK1, NUSAP1, SMC4, NDC80 |
| GO:0034613~cellular protein localization | 1.36E-02 | GRID2, LATS2, RRAGC, EYA1, LRRK2, RRAGD, DMD, ANK2, AXIN2, PRPF19, AJUBA |
| GO:0030032~lamellipodium assembly | 1.41E-02 | VAV3, CCDC88A, ABLIM1, KIT, ARHGEF4, WASF2, AJUBA, VAV2, ARHGEF6 |
| GO:0007157~heterophilic cell-cell adhesion via plasma membrane cell adhesion molecules | 1.50E-02 | PTPRD, TENM1, CDH4, TENM2, GRID2, ALCAM, TENM4, NRXN1, IL1RAPL1, FAT4, ITGA5, CD200 |
| GO:0010506~regulation of autophagy | 1.50E-02 | PYCARD, XBP1, RRAGC, DAPK1, LRRK2, RRAGD, MTMR8, ULK2, ABL2, PIK3R2, ATM, DEPDC5 |
| GO:0031572~G2 DNA damage checkpoint | 1.54E-02 | PLK1, CHEK1, MAPKAPK2, BRCA1, CLSPN, DTL, NEK11 |
| GO:0006268~DNA unwinding involved in DNA replication | 1.62E-02 | TOP2A, TOP2B, RAD51, MCM7, MCM4 |
| GO:0070072~vacuolar proton-transporting V-type ATPase complex assembly | 1.62E-02 | VMA21, DMXL1, DMXL2, ATP6V0A2, TM9SF4 |
| GO:0051272~positive regulation of cellular component movement | 1.62E-02 | LYN, STMN1, PDPN, ETS1, TGFBR1 |
| GO:0001657~ureteric bud development | 1.67E-02 | RET, ROBO2, BMPER, CAT, NPNT, SIM1, SMAD5, BMP7, FGFR2, FGFR1 |
| GO:0042953~lipoprotein transport | 1.67E-02 | MSR1, UNC119B, LRP1, PRKCB, APOB, ZDHHC17 |
| GO:0035335~peptidyl-tyrosine dephosphorylation | 1.70E-02 | PTPRT, MTMR2, PTPRN2, EYA1, MTMR8, TPTE, PTPN13, SSH2, CDC25A, DUSP6, PTPRG, SSH1, MTMR7, PTPRD, PTPRB, PTPRZ1, PTPN9, PTPN6, CDKN3 |
| GO:0000226~microtubule cytoskeleton organization | 1.71E-02 | SPECC1, CUL7, DOCK7, DCLK2, CRMP1, MID1, EML1, PTK2, WEE1, CDK1, TACC3, TACC2, MARK3, MARK1, CLASP2 |
| GO:0006661~phosphatidylinositol biosynthetic process | 1.82E-02 | VAC14, MTMR2, PIK3R2, PIK3CB, PIK3R1, PIK3R6, MTMR7, INPP4B, PIKFYVE, PIK3CA, INPP5D, PLCG2, PIP5K1B |
| GO:0000187~activation of MAPK activity | 1.83E-02 | MAP3K2, SHC2, INSR, LRRK2, LPAR1, TGFA, FRS2, NOD1, PIK3CB, IQGAP3, DUSP6, C5, IRAK1, MAPKAPK3, KIT, MAPKAPK2, CDK1, PLCE1, TDGF1, MAP2K5 |
| GO:0006269~DNA replication, synthesis of RNA primer | 1.91E-02 | PRIM2, POLA1, PRIM1, PRIMPOL |
| GO:0000710~meiotic mismatch repair | 1.91E-02 | MSH6, MSH2, MSH3, ERCC1 |
| GO:0007420~brain development | 1.91E-02 | ROBO2, CNTNAP2, PRKDC, CTTNBP2, SLC7A11, BRCA2, SPATA5, PCDH19, PCDH18, PTPRG, WRN, SHARPIN, RELN, PPP3CC, DPYSL2, STMN1, SIX3, ZIC1, CDK5RAP1, PHGDH, EPHA7, SYT1, HMGCS1, SLC6A11, UNC5C, PROX1, EML1, ITGA8, NF1, ATM, CNTN4 |
| GO:0031145~anaphase-promoting complex-dependent catabolic process | 1.93E-02 | PSMD14, ANAPC16, UBE2C, PLK1, BUB1B, AURKB, AURKA, CDC20, CCNB1, PSMB4, PSMB5, PSMC3, PSMD3, PSMB1, CDK1, PSME2 |
| GO:0097150~neuronal stem cell population maintenance | 1.96E-02 | ASPM, NOTCH1, PRRX1, FANCD2, FUT10, PROX1, FOXO3 |
| GO:0032008~positive regulation of TOR signaling | 2.06E-02 | FLCN, XBP1, RELN, HDAC3, RRAGC, RRAGD, SLC38A9, GAS6 |
| GO:0014065~phosphatidylinositol 3-kinase signaling | 2.06E-02 | PREX2, XBP1, NF1, PIK3R2, PIK3CB, PIK3R1, PIK3R6, IGF1R |
| GO:0008584~male gonad development | 2.10E-02 | KDM5A, NCOA1, RRM1, HMGCS1, INSR, RNF38, NCOA4, HMGB2, FANCA, ARID5B, TGFBR1, ASPM, MSH2, AGO4, CSDE1, ERCC1, KIT, ZFP42 |
| GO:0006302~double-strand break repair | 2.12E-02 | POLQ, EYA1, PRKDC, CDCA5, BRCA1, BRCA2, RAD52, BRIP1, WRN, MSH2, ERCC1, TDP1, TRIP13, NBN |
| GO:0030900~forebrain development | 2.15E-02 | DYNC2H1, TOP2B, SETD2, STIL, NOTCH1, APAF1, PCDH9, DLC1, FRS2, MAPK8IP3, DCLK1 |
| GO:0046328~regulation of JNK cascade | 2.22E-02 | F2RL1, TRAF2, GRIK2, MAPK8IP3, EPHB1, IGF1R |
| GO:0035855~megakaryocyte development | 2.22E-02 | VPS33B, ABI1, KIT, PTPN6, WASF2, FLI1 |
| GO:0006897~endocytosis | 2.25E-02 | SH3GL3, FNBP1, SH3KBP1, DENND1A, LRRK2, LRP5, FNBP1L, STON1-GTF2A1L, LRP8, MIB1, EEA1, RINL, RABEP1, DPYSL2, DNER, MYO6, AMPH, SNX7, RAB5A, ATP9B, RIN2, ATP9A, SNX6, PICALM |
| GO:1903364~positive regulation of cellular protein catabolic process | 2.33E-02 | VPS11, VPS35, PTTG1IP, FBXL5, DACT1 |
| GO:0001932~regulation of protein phosphorylation | 2.43E-02 | LYN, ITPKB, FLCN, CCDC88A, RAD51, SESN2, APOA1, FNIP1, PTK2 |
| GO:0050919~negative chemotaxis | 2.43E-02 | SEMA6B, SEMA5A, EPHA7, SEMA3C, SEMA6D, SEMA4C, APOA1, SLIT3, SEMA3F |
| GO:0010165~response to X-ray | 2.46E-02 | RAD51, MSH2, ERCC1, PMAIP1, ERCC8, BRCA2, TP63 |
| GO:0007616~long-term memory | 2.50E-02 | GRIA1, RELN, CAMK4, ADCY1, CPEB3, ADCY8, BTBD9, PJA2 |
| GO:1900034~regulation of cellular response to heat | 2.66E-02 | YWHAE, NDC1, CAMK2D, POM121, NUP205, NUP107, NUP133, NUP210, AAAS, NUP160, DNAJB1, MAPKAPK2, NUP35, ATM, ATR |
| GO:0051209~release of sequestered calcium ion into cytosol | 2.68E-02 | RYR1, RYR2, JPH3, RASA3, PRKCE, PLCG2, ITPR2, ITPR3, PKD2, RYR3 |
| GO:0006396~RNA processing | 2.78E-02 | DDX17, RBM39, PNPT1, CELF2, CSTF3, RTCA, TDRD9, TMTC1, MRPL44, HNRNPL, RCL1, LSM7, ATXN1, NOVA1, DHX35, DHX37, AGGF1, SUGP2 |
| GO:0061178~regulation of insulin secretion involved in cellular response to glucose stimulus | 2.88E-02 | EPHA5, NRXN1, PRKCE, LRP5, SIDT2, ADCY5 |
| GO:0050775~positive regulation of dendrite morphogenesis | 2.88E-02 | PTPRD, CUL7, CDKL5, CAPRIN1, IL1RAPL1, ILK |
| GO:0006171~cAMP biosynthetic process | 2.88E-02 | NPR3, ADM, ADCY2, ADCY1, ADCY8, ADCY5 |
| GO:0006816~calcium ion transport | 2.95E-02 | RYR1, RYR2, CAMK2D, PRKCB, CACNA2D1, CACNA1A, ITPR2, ATP2C1, PKD2, NALCN, CORO1A, RYR3, PPP3CA, GRIN3A, CACNA1S |
| GO:0007417~central nervous system development | 2.97E-02 | LYN, ROBO2, NCKAP1, SH3GL3, COX7B, CASZ1, CNTN6, ADAM22, DCLK1, NPAS2, STK3, RPS6KA3, RPS6KA6, BTD, RELN, PTPRZ1, DNER, DCX, ID3, NRCAM, SERPINI1 |
| GO:0090263~positive regulation of canonical Wnt signaling pathway | 2.97E-02 | PSMD14, JUP, LRRK2, USP34, LRRK1, ILK, AXIN2, NLE1, LRP6, ASPM, SFRP4, PSMB4, PSMB5, PSMC3, PSMD3, PSMB1, PSME2, VPS35, LGR5, SOX4, FGFR2 |
| GO:0050766~positive regulation of phagocytosis | 3.00E-02 | PYCARD, C3, RAP1A, SLC11A1, CD47, CALR, MERTK, GAS6 |
| GO:0009880~embryonic pattern specification | 3.04E-02 | PGAP1, ERBB4, SMAD5, BMP7, FGFR2, DISP1, LRP6 |
| GO:0050770~regulation of axonogenesis | 3.04E-02 | RET, CHN1, UST, CACNA1A, SLIT3, SSH2, SSH1 |
| GO:0010886~positive regulation of cholesterol storage | 3.08E-02 | MSR1, SCARB1, LPL, APOB |
| GO:0046069~cGMP catabolic process | 3.08E-02 | PDE10A, PDE2A, PDE5A, PDE9A |
| GO:0010882~regulation of cardiac muscle contraction by calcium ion signaling | 3.08E-02 | HDAC4, RYR2, ANK2, SLC8A1 |
| GO:0006333~chromatin assembly or disassembly | 3.08E-02 | SUV39H2, CHD3, HDAC8, ASF1B |
| GO:0042297~vocal learning | 3.08E-02 | CNTNAP2, NRXN1, NRXN2, STRA6 |
| GO:0009411~response to UV | 3.10E-02 | MSH6, TIPIN, KIAA0101, UVSSA, REV1, PMAIP1, ERCC8, DTL, RAD18, PRIMPOL |
| GO:0043009~chordate embryonic development | 3.19E-02 | CENPU, BRCA1, FGFR1 |
| GO:1900625~positive regulation of monocyte aggregation | 3.19E-02 | NR4A3, HAS2, CD44 |
| GO:0071596~ubiquitin-dependent protein catabolic process via the N-end rule pathway | 3.19E-02 | UBR3, UBR2, UBR1 |
| GO:0071233~cellular response to leucine | 3.19E-02 | SESN2, UBR2, UBR1 |
| GO:2000348~regulation of CD40 signaling pathway | 3.19E-02 | SHARPIN, FANCD2, FANCA |
| GO:0043517~positive regulation of DNA damage response, signal transduction by p53 class mediator | 3.20E-02 | SPRED2, ANKRD1, PMAIP1, ATM, ATR |
| GO:0006828~manganese ion transport | 3.20E-02 | TRPC7, SLC11A1, SLC11A2, ATP2C1, ZP3 |
| GO:0071498~cellular response to fluid shear stress | 3.20E-02 | MEF2C, XBP1, HDAC3, HAS2, PKD2 |
| GO:0071397~cellular response to cholesterol | 3.20E-02 | HMGCS1, LRP8, AACS, GPLD1, LRP6 |
| GO:0035641~locomotory exploration behavior | 3.20E-02 | PRKCE, LRRK2, SLC4A10, LSAMP, TNR |
| GO:0021954~central nervous system neuron development | 3.20E-02 | NTRK2, GABRB1, BTG2, HPRT1, ATP7A |
| GO:0009190~cyclic nucleotide biosynthetic process | 3.20E-02 | NPR3, ADCY2, ADCY1, ADCY8, ADCY5 |
| GO:0051310~metaphase plate congression | 3.20E-02 | CENPE, CENPF, KIF2C, FAM83D, NDC80 |
| GO:0007264~small GTPase mediated signal transduction | 3.24E-02 | DOCK5, RAB3C, DOCK4, DOCK3, RAB5C, DOCK9, ARL3, RASGRF2, DOCK8, LRRK2, DOCK7, RAP1GDS1, LRRK1, ITSN1, KNDC1, RND3, RHOBTB1, DOCK11, ARL5B, RAP1A, RAB25, PLCE1, RAB28, RAB6B, RAB8B, RALGPS2, VAV3, RAB2A, SH2D3C, VAV2, DAB1, RRAGC, SRPRB, RAPGEF6, RAB5A, RIN2, RAN |
| GO:0010212~response to ionizing radiation | 3.24E-02 | RRM1, EYA1, RFWD2, RFWD3, RAD54L, ATM, BRCA1, TOPBP1, LZIC, USP28, TICRR |
| GO:0050900~leukocyte migration | 3.47E-02 | LYN, CD84, PIK3R2, SLC7A11, PIK3CB, PIK3R1, MERTK, SLC7A6, COL1A2, GRB14, PIK3CA, INPP5D, PDE4B, F2RL1, PTPN6, CD47, ITGA5, APOB, GAS6, CD44, JAM3 |
| GO:0030335~positive regulation of cell migration | 3.52E-02 | SEMA5A, RET, NOTCH1, SEMA3C, ATP8A1, ILK, SEMA3F, IKBKAP, PIK3R1, CORO1A, SYNE2, CXCL16, IGF1R, HAS2, SEMA6B, LYN, XBP1, SEMA6D, INSR, SEMA4C, TGFBR1, PTK2, DIAPH1, DAB2, APC, KIT, F2RL1, ITGA5, TDGF1 |
| GO:0007131~reciprocal meiotic recombination | 3.57E-02 | MSH6, RNF212, RAD51, MSH2, MSH3, C11ORF80, ATM, TRIP13 |
| GO:0007268~chemical synaptic transmission | 3.60E-02 | GRIA1, GABRB2, RTN3, GRIA2, NRXN1, SLC1A1, CACNA1B, NRXN2, GRIK2, HTR4, LRP6, GLS, GPR176, GRM7, KCNMB4, DLGAP1, UNC13B, UNC13C, DTNA, SYT1, KCND2, HOMER1, MINK1, SLC6A13, MYO5A, SLC6A11, GRIN2B, PTPRD, LRFN5, DLG2, CACNB4, GLRB, NOVA1, GIPC1, AMPH, CEP89 |
| GO:0006406~mRNA export from nucleus | 3.61E-02 | NDC1, SMG1, POM121, NUP205, NUP107, NXT1, NUP133, CPSF1, NUP210, THOC2, AAAS, NUP160, THOC7, HHEX, NUP35, SRSF5, SRSF7, SRSF11 |
| GO:0007010~cytoskeleton organization | 3.63E-02 | LAMA5, SH3KBP1, TUBD1, CNN2, CECR2, ABLIM1, ZMYM4, MICAL1, DPYSL2, PLCE1, DMD, CTNNA2, SPTBN1, MARK1, ZRANB1, ANK2, WTIP, DIAPH1, ARHGAP10, FMNL2, GAN, KRT16, PALLD, ELMO2, BRWD1, AJUBA |
| GO:0030705~cytoskeleton-dependent intracellular transport | 3.64E-02 | MYO10, KIF16B, KIF5B, KIF14, KIF1C, KIF1B |
| GO:0048854~brain morphogenesis | 3.64E-02 | MKKS, SPEF2, FANCD2, SLC4A10, CTNNA2, FOXO3 |
| GO:0001822~kidney development | 3.86E-02 | ROBO2, ARL3, SERPINF1, ARID5B, SOX11, PROX1, PCSK5, DCN, TGFBR1, NLE1, CENPF, ITGA8, HAS2, WDPCP, C5ORF42, STRA6 |
| GO:0048013~ephrin receptor signaling pathway | 3.86E-02 | LYN, ACTR3, VAV3, EPHA5, EPHA7, ARHGEF28, ITSN1, KALRN, GRIN2B, PTK2, VAV2, RASA1, CHN1, EPHB1, EPHB4, EPHA3 |
| GO:0007080~mitotic metaphase plate congression | 3.89E-02 | CENPE, KIF18A, CCNB1, KIFC1, CDCA5, ZW10, KIF14, CDCA8, KIF2C |
| GO:0032467~positive regulation of cytokinesis | 3.89E-02 | RACGAP1, GIPC1, CSPP1, PRKCE, KIF14, KIF23, PKP4, AURKB, CIT |
| GO:0045893~positive regulation of transcription, DNA-templated | 3.90E-02 | RB1, KDM5A, RET, EHF, KDM8, HMGB2, FHL2, ILK, RSF1, RORA, BRCA1, FOXM1, BRCA2, ETS1, GRIP1, LBH, MDK, ZIC1, MYB, NOS1, MYBL1, SOX4, TP63, NCOA1, MEF2C, FBXW11, NCOA4, SOX11, PROX1, TGFBR1, ZFP90, CCNA2, NR5A2, ELF2, ASPH, TBL1XR1, ZP3, KDM7A, CREB5, HDAC4, NOTCH1, MAGED1, NOTCH4, LRP5, FOXO3, ARNTL2, NPAS2, CAMKK2, GLIS2, LRP6, CAND2, IRAK1, ERBB4, NRIP1, TASP1, HIVEP3, MAP3K2, NEK4, INSR, ATAD2, TRIP4, ESRRG, BMP7, SMAD5, DAB2, CAMK4, NAA16, RAN, PICALM |
| GO:0016337~single organismal cell-cell adhesion | 3.92E-02 | DSP, VEZT, TENM2, JUP, COL14A1, CTNND2, RPSA, LRP6, CDH3, PDPN, ITGA8, PKP1, NRCAM, NPHP4, PKP4, PKP3, CTNNA2, CD44 |
| GO:0034220~ion transmembrane transport | 4.02E-02 | GRIA1, RYR1, GABRB2, GRIA2, RYR2, GABRB1, ATP8A1, ATP10D, NEDD4L, GRIK2, ATP2C1, NALCN, NCALD, RYR3, UNC80, PIEZO2, ATP6V0A2, ANO10, ATP7A, ATP6V1F, GRID2, GRID1, ANO5, GRIN2B, ANO2, ANO1, GLRB, ASPH, C8ORF44-SGK3, SFXN4, SFXN5, UNC79 |
| GO:0014068~positive regulation of phosphatidylinositol 3-kinase signaling | 4.13E-02 | NTRK2, DCN, PTK2, RELN, HAX1, ERBB4, NEDD4, KIT, CAT, F2RL1, PTPN6, PIK3AP1, FGFR1 |
| GO:0043524~negative regulation of neuron apoptotic process | 4.13E-02 | GABRB2, NTRK2, CNTFR, MEF2C, BTG2, LRP1, ITSN1, KIF14, VEGFB, CACNA1A, ILK, GRIK2, CORO1A, CLN3, GCLC, NR4A3, PIK3CA, MSH2, MDK, AXL, RASA1, AARS |
| GO:0075733~intracellular transport of virus | 4.15E-02 | NDC1, POM121, NUP205, NUP107, XPO1, NUP133, NUP210, NUP35, AAAS, RAN, NUP160 |
| GO:0030818~negative regulation of cAMP biosynthetic process | 4.44E-02 | GRM7, PDE2A, GRM8, LPAR1, AKAP6 |
| GO:0006622~protein targeting to lysosome | 4.44E-02 | SCARB2, NEDD4, NCOA4, AP3B1, SORL1 |
| GO:0016180~snRNA processing | 4.44E-02 | INTS2, INTS10, INTS4, INTS7, INTS8 |
| GO:0035264~multicellular organism growth | 4.35E-02 | CTC1, STIL, PDE4D, PCDH15, SLC4A10, ARID5B, PALB2, TTC8, HHEX, KAT2A, TBL1XR1, ERCC1, UNC79, FGFR2, KDM6A |
| GO:0016477~cell migration | 4.42E-02 | LAMA5, ENPEP, SH3KBP1, WWC1, SDC3, PIK3CB, ERBB4, MDK, ABL2, FAM83D, USP24, ZRANB1, JUP, USP9Y, VAV2, CCDC88A, APC, PALLD, CDK1, ELMO1, ELMO2, FSCN3, LCP1, FGFR4, GAS6, EPHA3, FGFR1 |
| GO:0060612~adipose tissue development | 4.44E-02 | FTO, XBP1, PIK3CA, SH3PXD2B, LRP5, ARID5B, AACS |
| GO:0006656~phosphatidylcholine biosynthetic process | 4.44E-02 | PCYT1B, PCYT1A, SLC44A1, ABHD3, SLC44A2, APOA1, CHPT1 |
| GO:0034446~substrate adhesion-dependent cell spreading | 4.48E-02 | LAMA5, AXL, AKIP1, ITGA8, KIF14, ILK, ITGB7, MERTK, ANTXR1 |
| GO:0018107~peptidyl-threonine phosphorylation | 4.48E-02 | CLK1, CAMK2D, LRRK2, CAD, CHEK1, STK39, CDK1, TTK, TGFBR1 |
| GO:0006895~Golgi to endosome transport | 4.54E-02 | DOPEY1, AP4M1, DOPEY2, KIF16B, VPS13A, CORO7 |
| GO:0060314~regulation of ryanodine-sensitive calcium-release channel activity | 4.54E-02 | CAMK2D, JPH3, ASPH, PDE4D, DMD, NOS1 |
| GO:0051276~chromosome organization | 4.54E-02 | CENPT, SMCHD1, RAD54L, CDCA8, SMC4, ITPA |
| GO:0031290~retinal ganglion cell axon guidance | 4.54E-02 | ROBO2, EPHA7, ALCAM, NRCAM, BMPR1B, EPHB1 |
| GO:0010881~regulation of cardiac muscle contraction by regulation of the release of sequestered calcium ion | 4.54E-02 | RYR2, CAMK2D, ASPH, DMD, ANK2, SLC8A1 |
| GO:0051298~centrosome duplication | 4.54E-02 | STIL, CCP110, CEP192, BRCA2, PKD2, CKAP5 |
| GO:0071313~cellular response to caffeine | 4.54E-02 | RYR1, RYR2, SLC8A1, RYR3 |
| GO:0048671~negative regulation of collateral sprouting | 4.54E-02 | EPHA7, BCL11A, DCC, ULK2 |
| GO:0001841~neural tube formation | 4.54E-02 | SOX11, SOX4, STK3, MIB1 |
| GO:0048762~mesenchymal cell differentiation | 4.54E-02 | BMP7, TGFBR1, FGFR2, FGFR1 |
| GO:1904322~cellular response to forskolin | 4.54E-02 | EPHA5, ADCY2, ADCY1, ADCY5 |
| GO:0042698~ovulation cycle | 4.54E-02 | GABRB1, AXL, SERPINF1, BMPR1B |
| GO:0051315~attachment of mitotic spindle microtubules to kinetochore | 4.54E-02 | CENPE, CHAMP1, KIF2C, NDC80 |
| GO:0021707~cerebellar granule cell differentiation | 4.54E-02 | GRID2, NRXN1, KNDC1, PROX1 |
| GO:0051256~mitotic spindle midzone assembly | 4.54E-02 | RACGAP1, KIF4A, KIF23, AURKB |
| GO:0048339~paraxial mesoderm development | 4.54E-02 | EPB41L5, NUP133, TEAD2, FGFR1 |
| GO:0050773~regulation of dendrite development | 4.54E-02 | CDC20, CDKL5, BCL11A, DBN1 |
| GO:0051056~regulation of small GTPase mediated signal transduction | 4.74E-02 | RAP1GAP2, VAV3, RALGAPA2, RASGRF2, ITSN1, PIK3R2, GMIP, KALRN, MYO9A, RHOBTB1, VAV2, ARHGAP12, ARHGAP44, ARHGAP10, RACGAP1, OPHN1, DLC1, CHN1, ARHGEF4, SRGAP3, A2M, ARHGEF6 |
| GO:0070588~calcium ion transmembrane transport | 4.89E-02 | TRPC7, DENND5B, PDE2A, CACNA1B, CACNA1A, ATP2C1, PKD2, NALCN, SLC8A1, RYR3, TMC2, CACNB4, GRIN3A, GRM7, ASPH, IL1RAPL1, CACNA1S, ZP3, GAS6, TRPM6 |
| GO:0001889~liver development | 4.92E-02 | XBP1, NOTCH1, HMGCS1, CAD, ASNS, ARID5B, LSR, PROX1, PKD2, AACS, QDPR, PIK3CA, MAN2A1, NF1 |

GO, Gene Ontology

**Table S2 KEGG pathway enrichment analysis for host genes of differentially expressed circRNAs**

| Term | P-value | Genes |
| --- | --- | --- |
| hsa04914:Progesterone-mediated oocyte maturation | 1.37E-04 | PLK1, PDE3B, ARAF, ADCY2, PIK3R2, ADCY1, PIK3CB, PIK3R1, ADCY8, CDC25A, ADCY5, IGF1R, CCNA2, CCNB2, RPS6KA3, RPS6KA6, CCNB1, PIK3CA, AKT3, CDK1, CPEB3, CPEB2, BUB1 |
| hsa00230:Purine metabolism | 3.53E-04 | PRPS2, PRIM2, GDA, PRIM1, PDE3B, AK2, ADCY2, ADCY1, NT5C2, ADCY8, PAPSS1, ADCY5, POLD4, POLR2C, PDE4B, PDE4A, ENPP3, GUCY1A3, RRM1, PNPT1, RRM2, PDE4D, ENTPD5, PDE2A, NT5C3A, POLA1, PDE10A, POLR3A, POLR3B, POLE2, PDE3A, PDE5A, HPRT1, PDE7A, PDE9A, ITPA |
| hsa03460:Fanconi anemia pathway | 4.30E-04 | FANCI, FANCM, FANCL, FANCA, REV1, BRCA1, BRCA2, PALB2, BRIP1, RAD51, FANCD2, UBE2T, ERCC1, POLI, TELO2, ATR |
| hsa04070:Phosphatidylinositol signaling system | 8.25E-04 | MTMR2, PRKCB, DGKA, MTMR8, ITPR2, PIK3R2, ITPR3, PIK3CB, PIK3R1, MTMR7, ITPKB, INPP4B, PIKFYVE, INPP5A, PIK3CA, PPIP5K1, PPIP5K2, INPP5D, PLCG2, PLCE1, PIP5K1B, DGKI, IP6K2 |
| hsa04360:Axon guidance | 1.26E-03 | ROBO2, SEMA5A, SEMA3C, NTN4, SEMA3F, ROBO1, PPP3CA, ABLIM1, PPP3CC, RGS3, DPYSL5, DPYSL2, SLIT3, SRGAP3, EPHB1, EPHB4, SEMA6B, EPHA5, EPHA7, DCC, SEMA6D, SEMA4C, UNC5C, UNC5D, PTK2, RASA1, EPHA3 |
| hsa04110:Cell cycle | 1.95E-03 | RB1, YWHAE, MCM7, PRKDC, BUB1B, TTK, SMC3, ORC5, CDC20, CCNB2, CCNB1, CDC45, CHEK1, BUB1, PLK1, CDC25A, RBL2, CCNA2, WEE1, RBL1, CDK6, CDK1, MCM4, MCM5, ATM, ATR |
| hsa04114:Oocyte meiosis | 2.00E-03 | YWHAE, CAMK2D, FBXW11, PLK1, ITPR2, ADCY2, ITPR3, ADCY1, SMC3, ADCY8, AURKA, ADCY5, IGF1R, CDC20, CCNB2, RPS6KA3, PPP3CA, RPS6KA6, CCNB1, PPP3CC, CDK1, CPEB3, CPEB2, BUB1 |
| hsa04666:Fc gamma R-mediated phagocytosis | 4.07E-03 | LYN, VAV3, MYO10, PRKCB, PRKCE, PIK3R2, ASAP1, PIK3CB, PIK3R1, ASAP2, VAV2, FCGR2A, PIK3CA, INPP5D, AKT3, PLCG2, PIP5K1B, AMPH, WASF2 |
| hsa04720:Long-term potentiation | 4.72E-03 | GRIA1, GRIA2, CAMK2D, PRKCB, ARAF, ITPR2, ITPR3, ADCY1, ADCY8, GRIN2B, RPS6KA3, PPP3CA, RPS6KA6, RAP1A, PPP3CC, CAMK4 |
| hsa04115:p53 signaling pathway | 5.48E-03 | RRM2, CD82, APAF1, SERPINE1, RCHY1, PPM1D, CCNB2, CCNB1, CDK6, RFWD2, SESN2, CHEK1, CDK1, PMAIP1, ATM, ATR |
| hsa04512:ECM-receptor interaction | 6.00E-03 | LAMA5, LAMB3, VWF, LAMB2, ITGB4, LAMA4, HSPG2, RELN, COL1A2, COL4A4, ITGA8, COL4A5, TNR, COL6A3, ITGB7, CD47, ITGB6, ITGA5, CD44 |
| hsa04724:Glutamatergic synapse | 6.12E-03 | GRIA1, GRIA2, SLC38A1, HOMER1, PRKCB, HOMER2, SLC1A1, CACNA1A, ITPR2, ADCY2, ITPR3, ADCY1, GRIK2, ADCY8, GRIN2B, ADCY5, GLS, PPP3CA, GRIN3A, PPP3CC, GRM7, GRM8, DLGAP1 |
| hsa04662:B cell receptor signaling pathway | 7.28E-03 | LYN, VAV3, CHUK, PIK3R2, PIK3CB, PIK3R1, VAV2, PPP3CA, PPP3CC, PIK3CA, INPP5D, AKT3, BLNK, PLCG2, PTPN6, PIK3AP1 |
| hsa04722:Neurotrophin signaling pathway | 1.12E-02 | YWHAE, NTRK2, MAP3K3, CAMK2D, SHC2, MAP3K1, MAGED1, FRS2, PIK3R2, PIK3CB, PIK3R1, FOXO3, RPS6KA3, RPS6KA6, RAP1A, IRAK1, PIK3CA, CAMK4, MAPKAPK2, AKT3, PLCG2, MAP2K5, MAP3K5 |
| hsa05032:Morphine addiction | 2.02E-02 | GABRB2, GABRB1, PRKCB, PDE4D, PDE2A, PDE3B, CACNA1B, CACNA1A, ADCY2, ADCY1, ADCY8, ADCY5, PDE10A, PDE3A, PDE4B, PDE4A, GABRE, PDE7A |
| hsa05222:Small cell lung cancer | 2.23E-02 | RB1, LAMA5, LAMB3, CHUK, APAF1, LAMB2, LAMA4, PIK3R2, TRAF2, PIK3CB, PIK3R1, PTK2, CDK6, PIK3CA, COL4A4, AKT3, COL4A5 |
| hsa05214:Glioma | 2.36E-02 | RB1, CAMK2D, SHC2, PRKCB, ARAF, TGFA, PIK3R2, PIK3CB, PIK3R1, IGF1R, CDK6, PIK3CA, AKT3, PLCG2 |
| hsa05212:Pancreatic cancer | 2.36E-02 | RB1, CHUK, ARAF, TGFA, PIK3R2, PIK3CB, PIK3R1, BRCA2, TGFBR1, RAD51, CDK6, PIK3CA, AKT3, ARHGEF6 |
| hsa04151:PI3K-Akt signaling pathway | 2.517E-02 | YWHAE, ITGB4, PPP2R2A, BRCA1, PIK3CB, IGF1R, AKT3, MYB, TNR, ITGB7, ITGB6, IL4R, VWF, CHUK, RBL2, PIK3CA, COL4A4, KIT, IL3RA, ITGA8, COL4A5, COL6A3, ITGA5, CREB5, LAMA5, LAMA4, LPAR1, PIK3R2, PIK3R1, FOXO3, IL2RG, HSP90B1, RELN, THEM4, MCL1, LAMB3, LAMB2, INSR, VEGFB, PPP2R3B, PTK2, CDK6, COL1A2, PPP2R2C, C8ORF44-SGK3, PKN1, PIK3AP1, FGFR4, FGFR3, FGFR2, FGFR1 |
| hsa04012:ErbB signaling pathway | 2.72E-02 | STAT5A, CAMK2D, SHC2, PRKCB, ARAF, TGFA, PIK3R2, PIK3CB, PIK3R1, PTK2, PIK3CA, NRG3, NRG4, ERBB4, AKT3, PLCG2, ABL2 |
| hsa04977:Vitamin digestion and absorption | 2.82E-02 | SLC5A6, SCARB1, ABCC1, BTD, APOA1, APOB, SLC19A1 |
| hsa04510:Focal adhesion | 2.83E-02 | LAMA5, SHC2, ITGB4, LAMA4, ILK, PIK3R2, PIK3CB, PIK3R1, IGF1R, RELN, RAP1A, AKT3, CAPN2, TNR, ITGB7, ITGB6, VAV3, LAMB3, VWF, LAMB2, PRKCB, VEGFB, PTK2, VAV2, DIAPH1, COL1A2, PIK3CA, COL4A4, ITGA8, COL4A5, COL6A3, ITGA5, PPP1R12B |
| hsa04730:Long-term depression | 2.89E-02 | LYN, GUCY1A3, GRIA1, RYR1, GRIA2, GRID2, PRKCB, ARAF, CACNA1A, ITPR2, ITPR3, IGF1R, NOS1 |
| hsa04010:MAPK signaling pathway | 2.92E-02 | RASGRF2, CACNA1B, CACNA1A, RASGRP1, STK3, PPP3CA, RPS6KA3, RPS6KA6, RAP1A, PPP3CC, AKT3, STMN1, CACNA1S, MAP2K5, MAP3K5, MAP4K1, MAP3K2, MAP4K2, NTRK2, MAP3K3, MEF2C, MAP3K1, CHUK, PRKCB, CACNA2D1, TRAF2, MAPK8IP3, TGFBR1, DUSP6, CACNB4, MAPKAPK3, RASA1, RASA2, MAPKAPK2, NF1, FGFR4, FGFR3, FGFR2, FGFR1 |
| hsa05412:Arrhythmogenic right ventricular cardiomyopathy (ARVC) | 2.97E-02 | DSP, RYR2, JUP, ITGB4, CACNA2D1, SGCD, CACNB4, ITGA8, ITGB7, DMD, CACNA1S, ITGB6, CTNNA2, ITGA5 |
| hsa04370:VEGF signaling pathway | 3.25E-02 | SHC2, PRKCB, PIK3R2, PIK3CB, PIK3R1, PTK2, PPP3CA, PPP3CC, PIK3CA, MAPKAPK3, MAPKAPK2, AKT3, PLCG2 |
| hsa04144:Endocytosis | 3.56E-02 | SH3GL3, RAB5C, TFRC, SH3KBP1, NEDD4L, ASAP1, ASAP2, IL2RG, IGF1R, EEA1, RAB11FIP1, KIF5B, PSD4, PSD3, MVB12A, PIP5K1B, VPS35, SNX5, SNX6, PSD, ARFGEF2, USP8, TGFBR1, ACAP3, DAB2, ACAP2, ACAP1, RABEP1, NEDD4, CAPZA2, AMPH, FGFR4, SMAP1, FGFR3, RAB5A, FGFR2, SPG21 |
| hsa05210:Colorectal cancer | 3.65E-02 | DCC, ARAF, PIK3R2, PIK3CB, PIK3R1, AXIN2, TGFBR1, MSH6, APC, PIK3CA, MSH2, MSH3, AKT3 |
| hsa04921:Oxytocin signaling pathway | 3.90E-02 | RYR1, RYR2, CAMK2D, PRKAG1, PRKAG2, ITPR2, ADCY2, ITPR3, ADCY1, ADCY8, RYR3, CAMKK2, ADCY5, PPP3CA, PPP3CC, CACNA1S, MAP2K5, GUCY1A3, MEF2C, PRKCB, CACNA2D1, CACNB4, CAMK4, CAMK1, PPP1R12B |
| hsa03030:DNA replication | 3.93E-02 | PRIM2, POLD4, POLA1, MCM7, POLE2, PRIM1, MCM4, MCM5, DNA2 |
| hsa04923:Regulation of lipolysis in adipocytes | 4.01E-02 | PIK3CA, INSR, AKT3, PDE3B, PIK3R2, ADCY2, ADCY1, PIK3CB, PIK3R1, ADCY8, MGLL, ADCY5 |
| hsa05221:Acute myeloid leukemia | 4.01E-02 | STAT5A, JUP, PIK3CA, CHUK, AKT3, KIT, ARAF, PIM1, PIK3R2, PIK3CB, PIK3R1, RUNX1T1 |
| hsa05223:Non-small cell lung cancer | 4.00E-02 | RB1, CDK6, PIK3CA, PRKCB, AKT3, ARAF, PLCG2, TGFA, PIK3R2, PIK3CB, PIK3R1, FOXO3 |
| hsa05414:Dilated cardiomyopathy | 4.40E-02 | RYR2, ITGB4, CACNA2D1, ADCY2, ADCY1, ADCY8, TTN, ADCY5, SGCD, CACNB4, ITGA8, ITGB7, DMD, CACNA1S, ITGB6, ITGA5 |
| hsa05014:Amyotrophic lateral sclerosis (ALS) | 4.40E-02 | GRIA1, PPP3CA, GRIA2, PPP3CC, APAF1, CAT, NOS1, TNFRSF1B, GRIN2B, RAB5A, MAP3K5 |
| hsa04727:GABAergic synapse | 4.41E-02 | GABRB2, GABRB1, SLC38A1, PRKCB, PLCL1, CACNA1B, CACNA1A, ADCY2, ADCY1, ADCY8, ADCY5, GLS, TRAK2, CACNA1S, GABRE, SLC38A5 |

KEGG, Kyoto Encyclopedia of Genes and Genomes.

**Table S3 GO biological process enrichment analysis for differentially expressed protein-coding genes**

| Term | P-value | Genes |
| --- | --- | --- |
| GO:0007156~homophilic cell adhesion via plasma membrane adhesion molecules | 1.59E-09 | PCDHGB7, PCDHGB6, CLSTN2, PCDHGB5, PCDHGB4, PCDHGB3, PCDHGB2, PTPRM, PCDHGA8, PCDHGA7, PCDHGA6, PCDHGA5, CADM1, PCDHGA4, PCDHGC5, PCDHGA3, PCDHGC4, PCDHGA2, PCDHGC3, PCDHGA1, PCDHGA9, PCDHGA10, PCDHGA11, PCDHGA12, PCDHGB1, FAT4 |
| GO:0006695~cholesterol biosynthetic process | 1.13E-06 | SQLE, ACLY, MVK, HMGCS1, INSIG1, APOA1, MVD, HMGCR, DHCR7, LBR, FDFT1 |
| GO:0042981~regulation of apoptotic process | 5.60E-04 | SDF2L1, GDF15, ACTN2, DAPK3, TNFRSF11B, NOD1, ACTN4, PHB, NOL3, FBXO10, NME1, TP53INP1, PEA15, BCL3, CASP2, PMAIP1, FYN, FADD, INHA, BIRC3 |
| GO:0006915~apoptotic process | 5.95E-04 | SHC4, CSRNP1, RALB, KMT2A, MTFP1, SEMA3A, TNFAIP3, CXCR4, CAAP1, NOD1, TCHP, PEG10, TP53INP1, PEA15, CASP2, PMAIP1, KIF1B, FADD, PHLDA1, CTSC, SH3GLB1, CADM1, FEM1B, MAP1S, PRKCD, DAPK3, TNFRSF19, PAWR, FBXO10, NFKB1, GADD45G, NFKBIA, NR4A1, AIMP2, DAP, RRAGC, STK17A, BIRC3, ARHGEF6 |
| GO:0007165~signal transduction | 1.30E-03 | CXCL6, NRP1, FAM13B, PTPRM, ADM, CBLB, CXCL1, WISP2, HINT1, CHL1, MDK, RASSF4, PDE8A, PRKACB, MAP2K1, ANXA1, PPP1R12A, IGFBP4, FST, PRKCD, HPCAL4, RASA2, CDC42EP3, PPP1R12B, MAPRE2, OPTN, DDR2, PTGES, NFAT5, RALB, SLC20A1, MGST3, PEX11A, NOD1, TNFRSF11B, PHB, NDRG2, ARHGAP20, KLRK1, IRAK1, MICAL1, SPOCK3, KLRC4-KLRK1, ABL2, STAT6, FADD, SRGAP2, RALGDS, SH2B3, ANGPT2, DTNA, JUP, GDF15, TXNRD1, ARHGAP28, NFKB1, ARHGAP23, CLCN6, P2RX6, AFDN, NR4A1, GNRH1, GNB5, INHA, RAN, IL18R1 |
| GO:0032922~circadian regulation of gene expression | 1.39E-03 | PER1, KMT2A, ID2, GFPT1, BHLHE40, CRY1, TOP1, NPAS2, CIART |
| GO:0030198~extracellular matrix organization | 1.46E-03 | LUM, SERPINE1, FN1, ICAM3, TNFRSF11B, LAMC1, NID2, THBS1, DCN, COL3A1, GFOD2, COL5A2, BCL3, COL8A1, SERAC1, RECK, FBN1, DDR2 |
| GO:0051259~protein oligomerization | 1.56E-03 | SH3GLB1, GRHPR, IRAK1, CAV2, GJA5, TNFAIP3, CHP1, NOD1, NOL3 |
| GO:0008299~isoprenoid biosynthetic process | 1.57E-03 | MVK, HMGCS1, MVD, HMGCR, FDFT1 |
| GO:0002223~stimulatory C-type lectin receptor signaling pathway | 2.27E-03 | NFKBIA, KLRK1, RPS6KA5, PRKCD, KLRC4-KLRK1, ICAM3, KRAS, FYN, TAB2, PAK3, PRKACB, NFKB1 |
| GO:0021828~gonadotrophin-releasing hormone neuronal migration to the hypothalamus | 4.28E-03 | NRP1, NRP2, SEMA3A |
| GO:1903375~facioacoustic ganglion development | 4.28E-03 | NRP1, NRP2, SEMA3A |
| GO:0042127~regulation of cell proliferation | 5.10E-03 | CXCL6, ANXA1, NOS2, JUP, PTGER2, PLA2G4A, TNFRSF11B, NFKBIA, NR5A2, MAFG, ABL2, FYN, STAT6, DHCR7, ARHGEF2, INHA |
| GO:1900740~positive regulation of protein insertion into mitochondrial membrane involved in apoptotic signaling pathway | 5.22E-03 | SH3GLB1, PPP3R1, MAPK8, YWHAB, PMAIP1, YWHAH |
| GO:0021987~cerebral cortex development | 5.31E-03 | XAB2, AFDN, COL3A1, LRP1, MDK, NDE1, FAT4, SLC38A2 |
| GO:0002576~platelet degranulation | 6.09E-03 | SRGN, SERPINA1, ACTN2, LAMP2, SELENOP, SERPINE1, FN1, APOA1, ACTN4, THBS1, VCL |
| GO:1902285~semaphorin-plexin signaling pathway involved in neuron projection guidance | 8.34E-03 | NRP1, NRP2, SEMA3A |
| GO:0097490~sympathetic neuron projection extension | 8.34E-03 | NRP1, NRP2, SEMA3A |
| GO:0042345~regulation of NF-kappaB import into nucleus | 8.34E-03 | NFKBIA, BCL3, NOL3 |
| GO:0097491~sympathetic neuron projection guidance | 8.34E-03 | NRP1, NRP2, SEMA3A |
| GO:0036486~ventral trunk neural crest cell migration | 8.34E-03 | NRP1, NRP2, SEMA3A |
| GO:0032496~response to lipopolysaccharide | 1.05E-02 | CXCL6, MAOB, PTGER2, ADM, CXCL1, TNFRSF11B, DCN, TJP1, ADAM17, IRAK1, PELI1, GNRH1, TRIB1, PTGES |
| GO:0090398~cellular senescence | 1.06E-02 | MAP2K1, ID2, KAT6A, PRKCD, SMC5 |
| GO:0007254~JNK cascade | 1.06E-02 | MAPK8, IRAK1, TNFRSF19, NOD1, TAB2, TRIB1, ARHGEF6 |
| GO:0008152~metabolic process | 1.27E-02 | GSTM4, ACSS2, ACSM3, ACSL1, GSTO1, OXSM, INSIG1, BCKDHB, SGSH, AGPAT4, GRHPR, ECHDC3, BCAT1, L3HYPDH |
| GO:0042493~response to drug | 1.35E-02 | ANXA1, MAOB, HMGCS1, ACSL1, PTPRM, NFATC2, SLC1A3, APOA1, TGFA, AK4, ABAT, TNFRSF11B, CTPS1, THBS1, TJP1, LDHA, ADAM17, MDK, PMS2, FYN, TOP1 |
| GO:0061551~trigeminal ganglion development | 1.36E-02 | NRP1, NRP2, SEMA3A |
| GO:0006172~ADP biosynthetic process | 1.36E-02 | AK2, AK3, AK4 |
| GO:1901166~neural crest cell migration involved in autonomic nervous system development | 1.36E-02 | NRP1, NRP2, SEMA3A |
| GO:0046033~AMP metabolic process | 1.36E-02 | AK2, AK3, AK4 |
| GO:0034198~cellular response to amino acid starvation | 1.42E-02 | SH3GLB1, DAP, RRAGC, SLC38A2, ATF3 |
| GO:0070423~nucleotide-binding oligomerization domain containing signaling pathway | 1.42E-02 | CYLD, IRAK1, TNFAIP3, NOD1, TAB2 |
| GO:0015949~nucleobase-containing small molecule interconversion | 1.42E-02 | TXNRD1, AK2, AK4, CTPS1, NME1 |
| GO:0014912~negative regulation of smooth muscle cell migration | 1.48E-02 | NDRG4, LRP1, SERPINE1, TRIB1 |
| GO:1902043~positive regulation of extrinsic apoptotic signaling pathway via death domain receptors | 1.48E-02 | PEA15, PMAIP1, FADD, THBS1 |
| GO:0008610~lipid biosynthetic process | 1.48E-02 | ACLY, ACSS2, ACSL1, FDFT1 |
| GO:0016477~cell migration | 1.52E-02 | JUP, NDE1, SDC2, NFATC2, LAMC1, THBS1, MDK, KCTD13, ABL2, FYN, GPC6, TNS3, EPHA2, FGFR1 |
| GO:0001501~skeletal system development | 1.63E-02 | COL3A1, IGFBP4, GJA5, COL5A2, TNFRSF11B, AEBP1, INHA, PTHLH, SOX4, EPHA2, FGFR1, FBN1 |
| GO:0002042~cell migration involved in sprouting angiogenesis | 1.98E-02 | EFNB2, NR4A1, NRP1, EGR3 |
| GO:0007411~axon guidance | 1.94E-02 | MEG3, NRP1, NRP2, SEMA3A, WNT5A, EFNB2, RPS6KA5, CHL1, TUBB3, KRAS, FYN, WNT3, MATN2 |
| GO:0031397~negative regulation of protein ubiquitination | 1.95E-02 | CRY1, TNFAIP3, CHP1, FYN, N4BP1, SOX4 |
| GO:2000323~negative regulation of glucocorticoid receptor signaling pathway | 1.98E-02 | PER1, CRY1, PHB |
| GO:0002933~lipid hydroxylation | 1.98E-02 | CYP3A7-CYP3A51P, CYP3A4, CYP3A7 |
| GO:0055114~oxidation-reduction process | 2.02E-02 | MAOB, HIBADH, HMGCR, CYP3A4, HSD17B10, HSD11B1, LDHA, CYP11A1, MICAL1, SC5D, LBR, FDFT1, CYB5B, VAT1, NQO1, CBR1, KDM2A, NOS2, GSTO1, TXNRD1, BCKDHB, P3H2, OSGIN1, MICAL2, FMO4, PRDX6, ALDH3A2, GRHPR, SQLE, UGDH, GFOD2, DEGS1, DHCR7, MSRB1 |
| GO:0000187~activation of MAPK activity | 2.16E-02 | MAP2K1, IRAK1, WNT5A, PEA15, CXCR4, TGFA, NOD1, TAB2, PAK3, THBS1 |
| GO:0042149~cellular response to glucose starvation | 2.36E-02 | SH3GLB1, IFI16, SLC2A1, PMAIP1, NFE2L2 |
| GO:0007623~circadian rhythm | 2.45E-02 | PER1, EGR3, NOS2, ID1, SERPINE1, ID4, TOP1, NPAS2 |
| GO:0045893~positive regulation of transcription, DNA-templated | 2.50E-02 | MEG3, KMT2A, PHB, ING1, NPAS2, IRAK1, MDK, TP53INP1, GPBP1L1, SOX4, YWHAH, ZNF287, MAP2K1, FZD4, WNT5A, HMGA1, NFATC2, RUNX2, NFKB1, HIPK2, ELF1, KLF5, NR5A2, ELF4, ID2, KAT6A, BCL3, ZNF711, RAN, CREB5 |
| GO:0007568~aging | 2.50E-02 | NQO1, LRP1, FOXG1, ADM, ABAT, HMGCR, DCN, COL3A1, IRAK1, CASP2, GNRH1, CTSC, NFE2L2 |
| GO:0042178~xenobiotic catabolic process | 2.71E-02 | GSTM4, ACSL1, GSTO1 |
| GO:0008542~visual learning | 2.80E-02 | IFT20, NDRG4, HRH1, KMT2A, KRAS, HMGCR |
| GO:0030182~neuron differentiation | 2.92E-02 | MAP2K1, FZD4, WNT5A, ID1, DAPK3, WNT3, RUNX2, EPHA2, HIPK2 |
| GO:0048147~negative regulation of fibroblast proliferation | 2.95E-02 | MED25, TP53INP1, PAWR, PMAIP1, PEX2 |
| GO:0036120~cellular response to platelet-derived growth factor stimulus | 2.97E-02 | ERRFI1, PDGFD, FYN, CBL |
| GO:0032729~positive regulation of interferon-gamma production | 3.05E-02 | KLRK1, WNT5A, BCL3, KLRC4-KLRK1, FADD, IL18R1 |
| GO:0007155~cell adhesion | 3.06E-02 | NRP2, PTPRS, PCDHGB4, ICAM3, PRKX, LAMC1, NID2, THBS1, WISP2, EFNB2, CHL1, EMILIN2, ABL2, CTNNAL1, JUP, ACTN2, PCDHGC4, PCDHGC3, LSAMP, FN1, CASK, AFDN, ADAM17, AZGP1, COL8A1, VCL, DDR2 |
| GO:0098609~cell-cell adhesion | 3.20E-02 | SH3GLB1, DDX6, YWHAB, TMOD3, CBL, PRDX6, CNN3, TJP1, AFDN, LIMA1, LDHA, LASP1, ESYT2, LRRFIP1, PDLIM5, PHLDB2, RAN, EPHA2 |
| GO:0001666~response to hypoxia | 3.31E-02 | ANGPT2, NOS2, CXCR4, AGTRAP, ADM, ABAT, ACTN4, NOL3, THBS1, LDHA, ADAM17, CAPN2, HMOX2 |
| GO:0071230~cellular response to amino acid stimulus | 3.31E-02 | COL3A1, RRAGC, PDGFD, COL5A2, CAPN2, SH3BP4 |
| GO:0009083~branched-chain amino acid catabolic process | 3.43E-02 | HIBADH, BCKDHB, BCAT1, HSD17B10 |
| GO:0033598~mammary gland epithelial cell proliferation | 3.52E-02 | ID2, STAT6, EPHA2 |
| GO:2000774~positive regulation of cellular senescence | 3.52E-02 | HMGA1, PAWR, KRAS |
| GO:0060546~negative regulation of necroptotic process | 3.52E-02 | FADD, ARHGEF2, BIRC3 |
| GO:1902042~negative regulation of extrinsic apoptotic signaling pathway via death domain receptors | 3.62E-02 | PEA15, SERPINE1, TNFAIP3, FADD, ARHGEF2 |
| GO:0021762~substantia nigra development | 3.87E-02 | ZNF430, LDHA, MAOB, NDRG2, ACTB, YWHAH |
| GO:0043153~entrainment of circadian clock by photoperiod | 3.92E-02 | PER1, ID2, BHLHE40, CRY1 |
| GO:0001932~regulation of protein phosphorylation | 3.98E-02 | FLCN, FN1, APOA1, FNIP1, FNIP2 |
| GO:0043065~positive regulation of apoptotic process | 4.07E-02 | BARD1, ARHGEF12, ARHGEF17, DAPK3, OSGIN1, PAWR, ADM, GADD45G, FLCN, NR4A1, LDHA, MAPK8, STK17A, CASP2, PMAIP1, FADD, ARHGEF2, SOX4, ARHGEF6 |
| GO:0010506~regulation of autophagy | 4.17E-02 | IFI16, RRAGC, MTCL1, TP53INP1, DAPK3, ABL2 |
| GO:0086091~regulation of heart rate by cardiac conduction | 4.36E-02 | KCNH2, JUP, CACNA2D1, GJA5, CACNA1G |
| GO:2001223~negative regulation of neuron migration | 4.41E-02 | COL3A1, GNRH1, SRGAP2 |
| GO:0019852~L-ascorbic acid metabolic process | 4.41E-02 | GSTO1, SLC2A1, SLC2A3 |
| GO:0021612~facial nerve structural organization | 4.41E-02 | NRP1, NRP2, SEMA3A |
| GO:0021675~nerve development | 4.41E-02 | NRP1, NRP2, SEMA3A |
| GO:0061549~sympathetic ganglion development | 4.41E-02 | NRP1, NRP2, SEMA3A |
| GO:0035767~endothelial cell chemotaxis | 4.41E-02 | NR4A1, NRP1, EGR3 |
| GO:0002028~regulation of sodium ion transport | 4.45E-02 | PER1, NKAIN1, WNK1, YWHAH |
| GO:0043123~positive regulation of I-kappaB kinase/NF-kappaB signaling | 4.56E-02 | BST2, IRAK1, SLC20A1, TNFRSF19, PELI2, PELI1, FYN, NOD1, TAB2, FADD, WLS, BIRC3 |
| GO:0007040~lysosome organization | 4.77E-02 | SCARB2, CLN3, GNPTAB, HPS1, LYST |
| GO:0001525~angiogenesis | 4.83E-02 | NRP1, NRP2, ANGPT2, SERPINE1, FN1, TGFA, PRKX, KLF5, GJA5, ID1, COL8A1, MYH9, NRCAM, RAMP1, FGFR1 |

GO, Gene Ontology.

**Table S4 KEGG pathway enrichment analysis for differentially expressed protein-coding genes**

| Term | P-value | Genes |
| --- | --- | --- |
| hsa05205:Proteoglycans in cancer | 1.46E-04 | MAP2K1, ARHGEF12, PPP1R12A, FZD4, CAV2, LUM, SDC2, WNT5A, FN1, CBLB, CBL, THBS1, DCN, ACTB, MAPK13, CTSL, KRAS, PPP1R12B, PRKACB, WNT3, FGFR1 |
| hsa01130:Biosynthesis of antibiotics | 3.18E-04 | MVK, ACSS2, HMGCS1, GFPT1, BCKDHB, AK2, AK3, AK4, UAP1, HMGCR, HSD17B10, NME1, ALDH3A2, ACLY, SQLE, LDHA, SC5D, MVD, BCAT1, FBP1, FDFT1 |
| hsa04668:TNF signaling pathway | 3.35E-04 | MAP2K1, TNFAIP3, CXCL1, NFKB1, MAPK13, NFKBIA, MAPK8, RPS6KA5, BCL3, TAB2, FADD, IL18R1, BIRC3, CREB5 |
| hsa04510:Focal adhesion | 5.97E-04 | SHC4, MAP2K1, PPP1R12A, ACTN2, CAV2, FN1, LAMC1, ACTN4, THBS1, ACTB, COL3A1, MAPK8, PDGFD, COL5A2, CAPN2, FYN, PAK3, PPP1R12B, VCL, BIRC3 |
| hsa04621:NOD-like receptor signaling pathway | 1.65E-03 | NFKBIA, MAPK8, TNFAIP3, CXCL1, NOD1, TAB2, NFKB1, MAPK13, BIRC3 |
| hsa00280:Valine, leucine and isoleucine degradation | 2.51E-03 | ALDH3A2, HMGCL, HMGCS1, HIBADH, BCKDHB, ABAT, BCAT1, HSD17B10 |
| hsa04014:Ras signaling pathway | 4.25E-03 | SHC4, MAP2K1, RALB, ANGPT2, PLA2G4A, NFKB1, AFDN, MAPK8, GNG2, PDGFD, RASA2, ABL2, KRAS, GNB5, PAK3, RALGDS, PRKACB, EPHA2, FGFR1 |
| hsa05200:Pathways in cancer | 4.30E-03 | RALB, PTGER2, SLC2A1, CXCR4, TGFA, CBLB, LAMC1, CBL, MAPK8, GNG2, FADD, RALGDS, PRKACB, WNT3, MAP2K1, ARHGEF12, JUP, NOS2, FZD4, DAPK3, WNT5A, FN1, NFKB1, NFKBIA, KRAS, GNB5, BIRC3, FGFR1 |
| hsa04360:Axon guidance | 4.94E-03 | NRP1, ARHGEF12, SEMA3A, NFATC2, CXCR4, EFNB2, ABLIM1, PPP3R1, KRAS, FYN, PAK3, SRGAP2, EPHA2 |
| hsa04520:Adherens junction | 7.36E-03 | TJP1, AFDN, ACTN2, PTPRM, FYN, ACTN4, VCL, ACTB, FGFR1 |
| hsa05230:Central carbon metabolism in cancer | 1.39E-02 | SLC7A5, MAP2K1, SLC2A1, KRAS, SLC16A3, FGFR1, GLS, PDK1 |
| hsa05212:Pancreatic cancer | 1.50E-02 | MAP2K1, MAPK8, RALB, TGFA, KRAS, RALGDS, NFKB1, ARHGEF6 |
| hsa05130:Pathogenic Escherichia coli infection | 1.59E-02 | TUBA3D, TUBA1A, TUBB3, FYN, ARHGEF2, TLR5, ACTB |
| hsa04350:TGF-beta signaling pathway | 1.93E-02 | TGIF2, SMURF1, FST, ID2, ID1, ID4, SMAD6, THBS1, DCN |
| hsa04727:GABAergic synapse | 2.06E-02 | GABBR2, GABARAPL2, GNG2, ABAT, GNB5, SLC38A2, PRKACB, GABARAP, GLS |
| hsa04722:Neurotrophin signaling pathway | 2.24E-02 | SHC4, NFKBIA, MAP2K1, MAPK8, RPS6KA5, IRAK1, PRKCD, KRAS, SH2B3, NFKB1, MAPK13 |
| hsa04012:ErbB signaling pathway | 2.33E-02 | SHC4, MAP2K1, MAPK8, ABL2, TGFA, CBLB, KRAS, CBL, PAK3 |
| hsa04917:Prolactin signaling pathway | 2.35E-02 | SOCS2, SHC4, MAP2K1, LHCGR, MAPK8, KRAS, NFKB1, MAPK13 |
| hsa05146:Amoebiasis | 2.65E-02 | COL3A1, NOS2, ACTN2, COL5A2, FN1, ACTN4, LAMC1, PRKACB, VCL, NFKB1 |
| hsa01100:Metabolic pathways | 3.59E-02 | CMAS, ACSM3, HIBADH, ABAT, SGSH, GLS, C1GALT1C1, NAPRT, DSE, CBR1, CYP3A7-CYP3A51P, HMGCS1, ACSL1, OXSM, GPT2, BCKDHB, PLA2G4A, CTPS1, NME1, ALDH3A2, ACLY, UGDH, MVD, BCAT1, LCT, FBP1, PAFAH1B2, ACOT4, PTGES, MTMR2, PDXK, ACSS2, MVK, MAOB, AK2, UAP1, AK4, SGMS2, HMGCR, CYP3A4, HSD17B10, ABO, CYP3A7, AGPAT4, HSD11B1, HMGCL, LDHA, CYP11A1, MGAT5, SC5D, FDFT1, NOS2, GALNT2, GFPT1, PRDX6, GRHPR, SQLE, COQ3, DEGS1, PPT2, DHCR7, LPIN1 |
| hsa04380:Osteoclast differentiation | 3.80E-02 | NFKBIA, CYLD, MAP2K1, PPP3R1, MAPK8, NFATC2, FYN, TNFRSF11B, TAB2, NFKB1, MAPK13 |
| hsa05204:Chemical carcinogenesis | 4.15E-02 | GSTM4, HSD11B1, CBR1, CYP3A7-CYP3A51P, GSTO1, MGST3, CYP3A4, CYP3A7 |
| hsa05131:Shigellosis | 4.30E-02 | NFKBIA, MAPK8, NOD1, VCL, NFKB1, ACTB, MAPK13 |
| hsa00100:Steroid biosynthesis | 4.43E-02 | SQLE, SC5D, DHCR7, FDFT1 |
| hsa05020:Prion diseases | 4.62E-02 | MAP2K1, C7, FYN, LAMC1, PRKACB |
| hsa04660:T cell receptor signaling pathway | 4.78E-02 | NFKBIA, MAP2K1, PPP3R1, NFATC2, KRAS, FYN, PAK3, NFKB1, MAPK13 |
| hsa04010:MAPK signaling pathway | 4.84E-02 | MAP2K1, CACNA2D1, PLA2G4A, NFKB1, GADD45G, MAPK13, CACNA1G, NR4A1, PPP3R1, MAPK8, RPS6KA5, CACNB4, RASA2, KRAS, TAB2, PRKACB, FGFR1 |
| hsa04146:Peroxisome | 4.90E-02 | HMGCL, MVK, NOS2, ACSL1, PEX3, PEX11A, NUDT19, PEX2 |
| hsa05132:Salmonella infection | 4.90E-02 | TJP1, MAPK8, NOS2, CXCL1, TLR5, NFKB1, ACTB, MAPK13 |

KEGG, Kyoto Encyclopedia of Genes and Genomes.
